# Supplementary material for: New eco-friendly extraction of anionic analytes based on formation of layered double hydroxides
Source: Royal Society of Chemistry journal article supplement (doi:10.1039/c5gc00713e), 2015-01-01
Supplement: c5gc00713e1.pdf [file c5gc00713e1.pdf]

## New eco-friendly extraction of anionic analytes based on formation of layered double hydroxides

Sira Sansuk, Suwat Nanan and Supalax Srijaranai\*

*Materials Chemistry Research Center, Department of Chemistry and Center of Excellence for Innovation in Chemistry,*

*Faculty of Science, Khon Kaen University, Khon Kaen 40002, Thailand*

*E-mail: supalax@kku.ac.th*

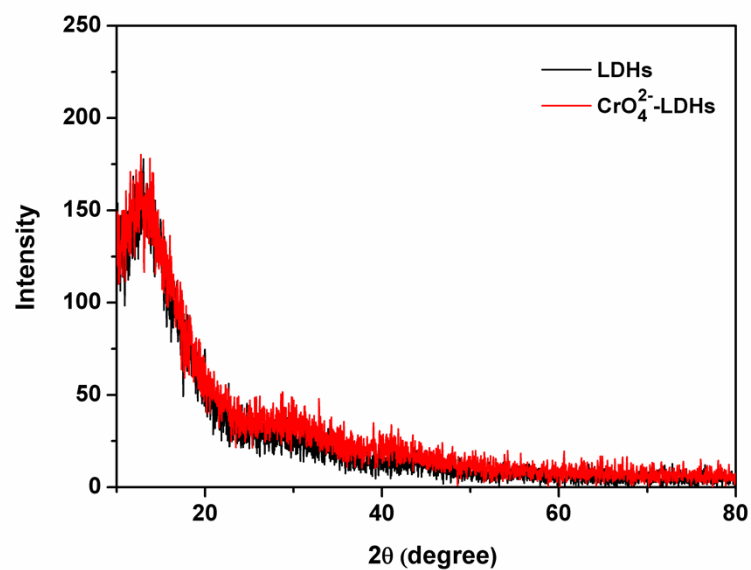

**Fig. S1** XRD patterns of LDH and CrO<sub>4</sub><sup>2-</sup>-LDH

**Table S1** The extraction rate and efficiency of 10 µg mL<sup>-1</sup> chromate solution

| Time<br>(min) | Absorbance at 373 nm |                 |                 | Extraction rate ( $A_t/A_0$ ) |                 |                 |              | % Extraction    |                 |                 |            |
|---------------|----------------------|-----------------|-----------------|-------------------------------|-----------------|-----------------|--------------|-----------------|-----------------|-----------------|------------|
|               | 1 <sup>st</sup>      | 2 <sup>nd</sup> | 3 <sup>th</sup> | 1 <sup>st</sup>               | 2 <sup>nd</sup> | 3 <sup>th</sup> | mean±SD      | 1 <sup>st</sup> | 2 <sup>nd</sup> | 3 <sup>th</sup> | mean±SD    |
| 0 ( $A_0$ )   | 0.3736               | 0.3786          | 0.3709          | 1                             | 1               | 1               | 1±0          | 0               | 0               | 0               | 0          |
| 0.25          | 0.0968               | 0.0999          | 0.1039          | 0.2591                        | 0.2674          | 0.2801          | 0.2674±0.011 | 74.10           | 73.60           | 71.98           | 73.23±1.11 |
| 0.50          | 0.0638               | 0.0609          | 0.0573          | 0.1708                        | 0.1609          | 0.1545          | 0.1621±0.008 | 82.92           | 83.90           | 84.55           | 83.80±0.82 |
| 1.00          | 0.0453               | 0.0433          | 0.0395          | 0.1213                        | 0.1144          | 0.1065          | 0.1141±0.007 | 87.87           | 88.56           | 89.34           | 88.59±0.74 |
| 1.50          | 0.0347               | 0.0284          | 0.0331          | 0.0929                        | 0.0724          | 0.0892          | 0.0848±0.011 | 90.70           | 92.76           | 91.06           | 91.50±1.10 |
| 2.00          | 0.0294               | 0.0260          | 0.0242          | 0.0787                        | 0.0687          | 0.0652          | 0.0709±0.007 | 92.13           | 93.13           | 93.48           | 92.91±0.70 |
| 3.00          | 0.0269               | 0.0257          | 0.0251          | 0.0693                        | 0.0679          | 0.0677          | 0.0683±0.001 | 92.76           | 93.21           | 93.24           | 93.17±0.82 |
| 5.00          | 0.0254               | 0.0245          | 0.0262          | 0.0680                        | 0.0647          | 0.0706          | 0.0677±0.003 | 93.18           | 92.54           | 92.93           | 93.22±0.31 |
| 10.00         | 0.0261               | 0.0244          | 0.0264          | 0.0699                        | 0.0644          | 0.0704          | 0.0682±0.003 | 93.02           | 92.55           | 92.96           | 93.18±0.33 |
| 30.00         | 0.0310               | 0.0265          | 0.0266          | 0.0731                        | 0.0702          | 0.0717          | 0.0716±0.008 | 91.70           | 93.01           | 92.82           | 92.51±0.71 |

**Table S2** The effect of hydroxide ion on the extraction efficiency of 10  $\mu\text{g mL}^{-1}$  chromate solution

| Amount of OH <sup>-</sup><br>( $\mu\text{mol}$ ) | Absorbance at 373 nm |                 |                 | % Extraction    |                 |                 |                  |
|--------------------------------------------------|----------------------|-----------------|-----------------|-----------------|-----------------|-----------------|------------------|
|                                                  | 1 <sup>st</sup>      | 2 <sup>nd</sup> | 3 <sup>th</sup> | 1 <sup>st</sup> | 2 <sup>nd</sup> | 3 <sup>th</sup> | mean $\pm$ SD    |
| No EISE ( $A_0$ )                                | 0.3706               | 0.3746          | 0.3689          | -               | -               | -               | -                |
| 0                                                | 0.2982               | 0.2972          | 0.2995          | 19.53           | 20.67           | 18.80           | 19.67 $\pm$ 0.94 |
| 50                                               | 0.2306               | 0.2287          | 0.2279          | 37.78           | 38.94           | 38.22           | 38.31 $\pm$ 0.59 |
| 100                                              | 0.1487               | 0.1538          | 0.1408          | 59.88           | 58.94           | 61.82           | 60.21 $\pm$ 1.47 |
| 150                                              | 0.0396               | 0.0411          | 0.0427          | 89.31           | 89.04           | 88.43           | 88.93 $\pm$ 0.45 |
| 200                                              | 0.0227               | 0.0304          | 0.0292          | 93.86           | 91.88           | 92.07           | 92.60 $\pm$ 1.09 |
| 250                                              | 0.0309               | 0.0323          | 0.0365          | 91.67           | 91.39           | 90.11           | 91.06 $\pm$ 0.83 |
| 300                                              | 0.1414               | 0.1459          | 0.1384          | 61.84           | 61.05           | 62.49           | 61.79 $\pm$ 0.72 |
| 400                                              | 0.2054               | 0.2158          | 0.2071          | 44.57           | 42.38           | 43.86           | 43.60 $\pm$ 1.11 |
| 500                                              | 0.2215               | 0.2226          | 0.2248          | 40.14           | 40.58           | 39.06           | 39.93 $\pm$ 0.78 |

**Table S3** The effect of Mg<sup>2+</sup>-Al<sup>3+</sup> on the extraction efficiency of 5 µg mL<sup>-1</sup> chromate solution

| Mg <sup>2+</sup> :Al <sup>3+</sup><br>(µmol) | Absorbance at 373 nm |                 |                 | % Extraction    |                 |                 |            |
|----------------------------------------------|----------------------|-----------------|-----------------|-----------------|-----------------|-----------------|------------|
|                                              | 1 <sup>st</sup>      | 2 <sup>nd</sup> | 3 <sup>th</sup> | 1 <sup>st</sup> | 2 <sup>nd</sup> | 3 <sup>th</sup> | mean±SD    |
| No EISE (A <sub>0</sub> )                    | 0.1809               | 0.1872          | 0.1883          | -               | -               | -               | -          |
| 30:10                                        | 0.1569               | 0.1631          | 0.1617          | 13.22           | 12.86           | 14.15           | 13.41±0.67 |
| 60:20                                        | 0.1323               | 0.1340          | 0.1374          | 26.89           | 28.44           | 27.01           | 27.45±0.86 |
| 90:30                                        | 0.0991               | 0.1062          | 0.1037          | 45.24           | 43.29           | 44.91           | 44.48±1.04 |
| 120:40                                       | 0.0460               | 0.0495          | 0.0473          | 74.55           | 73.54           | 74.88           | 74.32±0.70 |
| 180:60                                       | 0.0126               | 0.0117          | 0.0158          | 93.02           | 93.75           | 91.60           | 92.79±1.09 |
| 240:80                                       | 0.0271               | 0.0316          | 0.0295          | 85.03           | 83.14           | 84.33           | 84.17±0.95 |
| 300:100                                      | 0.0181               | 0.0239          | 0.0210          | 90.01           | 87.18           | 88.83           | 88.67±1.42 |

**Table S4** The effect of Mg<sup>2+</sup>-Al<sup>3+</sup> on the extraction efficiency of 10 µg mL<sup>-1</sup> chromate solution

| Mg <sup>2+</sup> :Al <sup>3+</sup><br>(µmol) | Absorbance at 373 nm |                 |                 | % Extraction    |                 |                 |            |
|----------------------------------------------|----------------------|-----------------|-----------------|-----------------|-----------------|-----------------|------------|
|                                              | 1 <sup>st</sup>      | 2 <sup>nd</sup> | 3 <sup>th</sup> | 1 <sup>st</sup> | 2 <sup>nd</sup> | 3 <sup>th</sup> | mean±SD    |
| No EISE (A <sub>0</sub> )                    | 0.3699               | 0.3750          | 0.3718          | -               | -               | -               | -          |
| 30:10                                        | 0.3029               | 0.3127          | 0.3083          | 18.10           | 16.62           | 17.09           | 17.27±0.76 |
| 60:20                                        | 0.2387               | 0.2357          | 0.2384          | 35.48           | 37.14           | 35.89           | 36.17±0.86 |
| 90:30                                        | 0.1734               | 0.1662          | 0.1735          | 53.12           | 55.67           | 53.33           | 54.04±1.41 |
| 120:40                                       | 0.0924               | 0.1012          | 0.1003          | 75.11           | 73.02           | 73.03           | 73.72±1.20 |
| 180:60                                       | 0.0245               | 0.0351          | 0.0268          | 93.38           | 90.65           | 92.80           | 92.28±1.44 |
| 240:80                                       | 0.0399               | 0.0338          | 0.0382          | 89.22           | 91.00           | 89.73           | 89.98±0.92 |
| 300:100                                      | 0.0513               | 0.0482          | 0.0445          | 86.14           | 87.15           | 88.04           | 87.11±0.95 |

**Table S5** The effect of Mg<sup>2+</sup>-Al<sup>3+</sup> on the extraction efficiency of 16.7 µg mL<sup>-1</sup> chromate solution

| Mg <sup>2+</sup> :Al <sup>3+</sup><br>(µmol) | Absorbance at 373 nm |                 |                 | % Extraction    |                 |                 |            |
|----------------------------------------------|----------------------|-----------------|-----------------|-----------------|-----------------|-----------------|------------|
|                                              | 1 <sup>st</sup>      | 2 <sup>nd</sup> | 3 <sup>th</sup> | 1 <sup>st</sup> | 2 <sup>nd</sup> | 3 <sup>th</sup> | mean±SD    |
| No EISE (A <sub>0</sub> )                    | 0.5968               | 0.6041          | 0.6019          | -               | -               | -               | -          |
| 30:10                                        | 0.4679               | 0.4841          | 0.4833          | 21.60           | 19.86           | 19.71           | 20.39±1.05 |
| 60:20                                        | 0.3707               | 0.3747          | 0.3618          | 37.88           | 37.97           | 39.89           | 38.58±1.13 |
| 90:30                                        | 0.2178               | 0.2098          | 0.2111          | 63.51           | 65.27           | 64.93           | 64.57±0.93 |
| 120:40                                       | 0.1571               | 0.1735          | 0.1635          | 73.67           | 71.28           | 72.83           | 72.59±1.21 |
| 180:60                                       | 0.0407               | 0.0390          | 0.0313          | 93.18           | 93.55           | 94.80           | 93.84±0.84 |
| 240:80                                       | 0.0732               | 0.0721          | 0.0606          | 87.74           | 88.06           | 89.93           | 88.58±1.18 |
| 300:100                                      | 0.0582               | 0.0477          | 0.0745          | 90.25           | 92.17           | 92.09           | 91.50±1.09 |
